# Supplementary material for: Determination of exercise intensity domains during upright versus supine cycling: a methodological study
Source: PeerJ. 2022 Apr 13;10:e13199. doi: 10.7717/peerj.13199 (PMC9013233; doi:10.7717/peerj.13199)
Supplement: Supplemental Information 3 [file peerj-10-13199-s003.xlsx]

## Sheet: General info.
																	upright	upright	supine	supine
			Age	BH	BM	Bmi	SBP	DBP	MAP	Rest HR	Sbp	Dbp	MAP	Rest HR	FEV	FVC1	Leg pain	Dispnea	Leg pain	Dispnea
	Vo2 max uprigh	Vo2 max supine
1	da	da	20	181	72		131	58	82.3333	62	135	62	86.3333	63			8	7	10	8
2
3	da	da	20	190	80		129	71	90.3333	81	125	72	89.6667	80			10	8	10	6
4	da	da	21	191	92		130	62	84.6667	65	134	72	92.6667	65			8	7	10	8
5	da	da	20	187	100		135	79	97.6667	63	140	80	100	63			8	10	10	10
6	da	da	20	187	80		115	78	90.3333	65	108	57	74	65			10	7	10	9
7	da	da	23	186	79		134	79	97.3333	62	129	73	91.6667	67			10	7	9	8
8	da	da	26	181	81		136	72	93.3333	62	128	77	94	62			10	6	10	6
9	da	da	22	181	75		127	80	95.6667	70	124	69	87.3333	62			8	7	9	7
10	da	Da	23	185	78		129	64	85.6667	61	131	59	83	60			8	10	10	8
11	da	da	21	180	75		127	62	83.6667	65	128	64	85.3333	63			10	7	10	6
12	da	da	21	185	82		105	62	76.3333	61	107	64	78.3333	64			9	7	8	7
13	da	da	21	189	76		127	64	85	71	128	74	92	72			10	8	8	7
14	da	da	22	187	86		127	79	95	70	126	75	92	64
15	da	da	35	185	90		123	77	92.3333	63	124	77	92.6667	61			9	8	10	7
16	13:30:00		22	176	65
17	da	da	21	196	90		121	67	85	60	121	68	85.6667	60			9	7	8	9
18	da	da	24	181	77												10	9	10	8
19	Da	da	21	183	75												9	8	10	8
20		da	23	187	88												9	9	9	8	HR max	181
			22.4211	185.158	81.1053		126.4	70.2667	88.9778	65.4	125.867	69.5333	88.3111	64.7333			9.11765	7.76471	9.47059	7.64706
	nema		3.46787	4.66702	8.16116
	nema

## Sheet: Supine measures
Cloeses	Farest	relative position of the heart
155	110	36
146	110	34
154	125	36
146	110	35
164	136	35
162	120	32
145	110	35
145	110	34
160	123	35
152	121	34
158	117	34
148	111	33
140	127	33
140	126	33
140	110	33
145	112	33
		32
		33
		33.8889
		1.2314

## Sheet: PPO calc.
															Mjerenja
	Upright				upright	upright		Supine				supine	supine		PON	09:30:00
	HR	PPO	PPO110	PPO90	Leg pain	Dispnea		HR	PPO	PPO110	PP090	Leg pain	Dispnea		PON	10:30:00
1	191	320	352	288	10	8		189	282	310.2	253.8	8	7		PON	15:00:00
2	192	254	279.4	228.6	9	7		188	218	239.8	196.2	8	9		UTO	09:00:00
3	190	291	320.1	261.9	10	7		180	251	276.1	225.9	9	8		UTO	10:00:00
4	175	300	330	270				163	253	278.3	227.7				UTO	11:00:00
5	193	338	371.8	304.2	10	7		187	303	333.3	272.7	10	9		UTO	12:30:00
6	201	302	332.2	271.8	8	10		192	254	279.4	228.6	10	8		UTO	15:00:00
7	191	309	339.9	278.1	9	7		177	280	308	252	8	7		SRI	09:30:00
8	192	324	356.4	291.6	8	10		189	299	328.9	269.1	10	10		SRI	10:15:00
9	201	355	390.5	319.5	10	7		187	282	310.2	253.8	10	6		SRI
10	198	345	379.5	310.5	8	7		199	318	349.8	286.2	9	7
11	174	260	286	234	10	6		171	235	258.5	211.5	10	6
12	190	294	323.4	264.6	8	7		191	279	306.9	251.1	10	8
13	184	328	360.8	295.2	10	8		190	294	323.4	264.6	10	6
14	195	340	374	306	9	8		156	323	355.3	290.7	10	8		10	9		10	8	9	8	10	8	10	8	10	9	8	9	10	9
15	182	352	387.2	316.8	8	7		163	265	291.5	238.5	10	8
16	170	325	357.5	292.5	9	8		140	248	272.8	223.2	10	7
17	195	333	366.3	299.7	10	9		193	294	323.4	264.6	10	8
18	177	262	288.2	235.8	9	9		175	253	278.3	227.7	9	8
	188.389	312.889	344.178	281.6	9.11765	7.76471		179.444	273.944	301.339	246.55	9.47059	7.64706
	upright	upright	supine	supine
	Leg pain	Dispnea	Leg pain	Dispnea
1	10	8	8	7
2	9	7	8	9
3	10	7	9	8
4
5	10	7	10	9
6	8	10	10	8
7	9	7	8	7
8	8	10	10	10
9	10	7	10	6
10	8	7	9	7
11	10	6	10	6
12	8	7	10	8
13	10	8	10	6
14	9	8	10	8
15	8	7	10	8
16	9	8	10	7
17	10	9	10	8
18	9	9	9	8

## Sheet: GET i RCP
			Upright											Supine
			GET	-30	RCP	WattiGET	30 -GET	90%GET	WattiRCP					GET	GET -30	RCP	GETWatti	30-GET	90%GET	Watti RCP
	14		8;15	7;50	11;20	214	204	183.6	275					7.1	6;40	10;10	190	180	162	251
								0
4	4		07:40:00	7;10	10:45:00	201	191	171.9	263					6;25	6;00	8;35	178	166	149.4	221
5	5		7;30	7;00	11;00	193	183	164.7	267					5;30	5;05	8;20	159	149	134.1	216
			8;25	7;55	10;45	216	206	185.4	262					6;55	6;25	9	185	175	157.5	227
	8		7;35	7;05	9;45	198	188	169.2	242					5;35	5;05	8;20	157	147	132.3	214
2	2		07:15:00	6;45	10:00:00	194	184	165.6	249					06:00:00	5;30	08:15:00	175	161	144.9	214
	13		8;15	7;45	10;45	211	200	180	261					7;40	7;10	10;30	200	190	171	257
			10.35	10.05	13.4	257	247	222.3	320					8.05	7.35	9;45	207	197	177.3	242
3	3		8;00	7;30	11;15	204	195	175.5	270					7;30	6;50	10.35	195	184	165.6	260
			7.3	7	9.3	196	185	166.5	237					6.2	5;40	8.15	174	164	147.6	212
			7;15	6;45	10;00	195	185	166.5	249					5;25	4;55	8;40	158	148	133.2	224
	9		6;25	6	10.55	174	165	148.5	264					6;25	6	9.25	175	165	148.5	236
6	6		09:40:00	8;50	12:00:00	240	228	205.2	287					08:40:00	7;50	11:00:00	220	206	185.4	267
			10;00	9;30	12;45	249	239	215.1	304					7.05	6.35	8;50	191	181	162.9	226
1	1		07:20:00	06:55:00	11:00:00	193	183	164.7	267					06:00:00	5;30	08:00:00	167	157	150.3	207
	7		7;15	6;45	10.3	191	182	163.8	257					06:50:00	06:20:00	10:45:00	185	176	158.4	264

## Sheet: Kinetika
Upright								Supine
Baseline	Amplitude	Time delay	Tau	MRT	VO2 last 2 min			Baseline	Amplitude	Time delay	Tau		VO2 last 2 min
0.9078	0.8093	43.79	10.9	54.69	1.7173	r2=0,87		1.217	0.7175	21.25	40.74	61.99	2.0012	r2=0,89
0.9223	0.9669	1.5	28.54	30.04	1.90691			1.448	0.7195	15.41	54.07	69.48	2.14293			1.448
1.208	0.6198	27.59	22.97	50.56	1.84024	dobar zapis		1.292	0.7858	19.07	30.28	49.35	2.0705	dobar zapis		0.7195
0.9885	0.8347	6.215	36.01	42.225	1.80028			1.341	0.7104	13.37	25.55	38.92	2.12241			15.41
0.9154	0.9261	12.43	57.46	69.89	1.82434			1.009	0.7996	10.29	35.55	45.84	1.83083			54.07
0.9814	0.8017	17.44	23.53	40.97	1.76909			1.234	0.9604	9.734	67.05	76.784	2.25183
NE					1.75845			1.137	0.6088	1.84	57.21	59.05	1.74572
1.016	0.8109	22.04	38.37	60.41	1.82208			1.221	0.56	23.49	44.49	67.98	1.79404	r2=0,89
1.185	0.6252	30.06	18.6	48.66	1.789	dobar zapis		1.357	0.6796	6.87	43.31	50.18	2.0586
1.063	0.7805	10.8	34.48	45.28	1.82729			1.349	0.724	16.6	35.28	51.88	2.02627	R2=0,81
0.8622	0.8536	15.77	23.77	39.54	1.70288			1.336	0.6577	17.82	28.54	46.36	1.88052	R2=0,95
0.9027	0.7262	30	16.36	46.36	1.61327			1.07	0.9059	16.27	41.49	57.76	1.90752
1.122	0.5793	23.33	33.75	57.08	1.7185			0.958	0.8384	20.71	44.55	65.26	1.77031
1.012	0.7002	11.43	47.57	59	1.67588			0.9768	0.8169	3.989	48.05	52.039	1.84436
0.9079	0.8901	21.8	33.73	55.53	1.83243			1.401	0.7963	15.89	34.87	50.76	2.25682
1.003	0.8077	18.61	26.87	45.48	1.84765			1.473	0.871	18.3	44.89	63.19	2.47525	r2=0,94
1.043	0.834	27.5	30.16	57.66	1.83009			1.045	0.8302	15.5	26.56	42.06	1.85731	dobar
0.9532	0.8752	21.07	20.03	41.1	1.88694			1.157	0.6866	23.17	21.52	44.69	1.87377	zapis
1.081	0.8267	25.16	19.21	44.37	1.89634	odlican zapis		1.096	0.8988	19.04	20.58	39.62	2.001	odlican zapis
1.106	0.7773	20.92	30.52	51.44	1.86523	r2=0,96		1.246	0.8244	12.22	23.85	36.07	2.03113	r=0,98
0.9884	0.7853	31.94	12.76	44.7	1.74365			1.1195	0.71295	18.495	37.115	55.61	1.8706
0.98865	0.87425	2.17	26.14	28.31	1.87545			1.328	0.68475	16.7	43.29	59.99	1.98647
1.145	0.8177	9.858	59.42	69.278	1.86872			1.386	0.6323	21.02	63.38	84.4	1.99
1.087	0.6922	16.73	20.36	37.09	1.88341	r2=0,96		1.195	0.8214	14.62	52.29	66.91	2.05209	r2=0,98
1.118	0.7009	16.64	49.06	65.7	1.80285	r2=0,966		1.206	0.7663	1.532	37.15	38.682	1.948
1.077	0.7486	10.49	45.4	55.89	1.82821			1.283	0.5755	24.23	7.431	31.661	1.86462
1.235	0.68	30.32	40.4	70.72	1.85944			1.314	0.5643	19.75	25.57	45.32	1.92211	r2=0,93
1.086	0.7256	16.58	38.74	55.32	1.74825			1.363	0.5211	18.41	25.66	44.07	1.934	r2=0,81
1.151	0.6593	26.13	32.32	58.45	1.83563			1.229	0.8701	33.41	36.35	69.76	2.20576
1.052	0.8069	18.89	27.99	46.88	1.83799			1.274	0.7911	41.13	29.25	70.38	2.08515	r2=0,97
NE								NE
1.09	0.7307	32.48	21.84	54.32	1.82909			1.304	0.6084	16.59	19.71	36.3	1.92
												0
1.069	0.7613	20.09	14.62	34.71	1.77			1.022	0.7084	15.74	33.49	49.23	1.74	dobar
1.055	0.7816	2.84	23.74	26.58	1.844			1.208	0.65	17.99	32.51	50.5	1.83	Zapis
1.0041	0.8284	11.955	21.885	33.84	1.86547			1.044	0.7968	1.3	36.41	37.71	1.87711
1.04505	0.777	14.2675	30.3125	44.58	1.80686			1.192	0.8238	14.78	28.32	43.1	2.03257	R2=0,91
1.04034	0.776916	19.0834	29.9358	49.0192	1.80923			1.22375	0.740543	16.4723	36.4673	51.4691	1.97717

## Sheet: KINETIKA MEF
	Baseline1	Amplitude1	Time delay1	Tau1	VO2 last 2 min	R2	Baseline2	Amplitude2	Time delay2	Tau2	VO2 last 2 min	R2	Baseline	Amplitude	Time delay	Tau	VO2 last 2 min	R3		tau as	VO2 mean
s1	1.091	1.496	10.74	59.83	2.64412	0.9588	1.303	1.369	16.73	54.29	2.8345	0.8728	1.342	1.382	13.43	41.64	2.82644	0.88		51.92	2.76835
s2	1.68	0.9635	13.1	21.1	2.8487	0.78	1.508	1.366	14.87	42.78	2.932	0.89	1.365	1.384	24.83	29.26	2.74507	0.82		31.0467	2.84192
s3	1.283	1.653	18.36	43.52	3.10587	0.95	1.148	1.854	10.91	41.01	3.10841	0.95	1.182	1.873	7.32	36.56	3.15415	0.96		40.3633	3.12281
s4	1.33	1.929	13.24	56.19	3.1566	0.94	1.38	1.807	12.48	43.49	3.41256	0.93	1.276	2.082	15.55	68.86	3.34745	0.95		56.18	3.30554
s5	1.124	1.315	14.36	61.84	2.45381	0.87	1.383	1.211	16.81	49.06	2.63491	0.82	1.319	1.379	15.06	50.75	2.74437	0.88		53.8833	2.61103
s6					2.73465						2.82647		1.488	1.259	21.37	50.1	2.74022	0.93		50.1	2.76711
s7	1.268	1.693	22.29	36.15	3.01777	0.93	1.557	1.427	35.94	18.84	3.11048	0.94	1.675	1.395	30.63	20.3	3.17779	0.94		25.0967	3.10201
s8	1.148	1.355	19.2	44	2.31	0.85	1.047	1.255	9.994	41.9	2.421	0.86	1.249	0.9412	28.41	23.1	2.31	0.84		36.3333	2.347
s9	1.214	0.8934	6.289	63.8	2.09612	0.86	1.014	0.8415	21.38	50.07	1.80017	0.9	0.9778	0.9647	16.32	44.05	1.95024	0.85		52.64	1.94885
s10	1.02	1.792	19.48	53.41	2.755	0.93	1.183	1.811	19.6	36.56	3.01	0.95	1.351	1.682	23.83	49.1	2.98	0.91		46.3567	2.915
s11	1.365	1.454	2.15	62.54	2.77	0.9	1.343	1.479	17.43	34.68	2.95	0.82	1.515	1.633	27.33	37.67	2.95	0.92		44.9633	2.89
s12							1.412	1.143	12.7	53.08	2.57225	0.91	1.432	1.243	2.428	56.63	2.81679	0.94		54.855	2.69452
s13	1.202	2.242	8.213	73.27	3.47223	0.97	1.549	1.827	5.082	43.64	3.49096	0.96	1.4	2.027	9.046	54.24	3.43778	0.95		57.05	3.46699
s14	1.365	1.778	15.46	54.73	3.04964	0.92							1.434	1.581	9.824	37.97	2.99817	0.92		46.35	3.02391
	tau	VO2 mean (mL min)
1	51.92	2.76835
2	31.0467	2.84192
3	40.3633	3.12281
4	56.18	3.30554
5	53.8833	2.61103
6	50.1	2.76711	44.392
7	25.0967	3.10201	10.655
8	36.3333	2.347
9	52.64	1.94885
10	46.3567	2.915	48.2283
11	44.9633	2.89
12	54.855	2.69452
13	57.05	3.46699
14	46.35	3.02391
